# Supplementary material
Source: PubMed Central journal article supplement (PMC10782382)
Supplement: jamapsychiatry-e235045-s001.pdf [file jamapsychiatry-e235045-s001.pdf]

## Supplementary Online Content

Chai G, Xu J, Goyal S, et al. Trends in incident prescriptions for behavioral health medications in the US, 2018-2022. *JAMA Psychiatry*. Published online January 10, 2024. doi:10.1001/jamapsychiatry.2023.5045

**eMethods.** Detailed Methodology

**eTable 1.** Total (Prevalent) Prescriptions Dispensed by Selected USC Drug Classes and Drugs, April 2018-March 2022

**eTable 2.** Interrupted Time-Series Regression Sensitivity Analyses of Monthly Incident Prescriptions Dispensed (in Thousands) for Selected Drug Classes and Drugs, Before and During the COVID-19 Pandemic

This supplementary material has been provided by the authors to give readers additional information about their work.

## eMethods. Detailed Methodology

The equation listed below summarizes our ITSA model specifications:

$$Y_t = \beta_0 + \beta_1 T_t + \beta_2 X_t + \beta_3 X_t T_t + \varepsilon_t$$

where  $Y_t$  is the monthly aggregated number of incident prescriptions dispensed measured in month  $t$ ,  $T_t$  is the time since the start of study period (in months) by the time of month  $t$ ,  $X_t$  is a dummy (indicator) variable representing if the month is in the COVID-19 pandemic period (April 2020 onwards) or not, and  $X_t T_t$  is an interaction term.  $\beta_0$  represents the intercept or starting level of the outcome variable.  $\beta_1$  is the trajectory (slope) of the outcome variable until the start of COVID-pandemic. The model allows to test for both a one-time immediate level change at the start of the COVID-pandemic (intercept;  $\beta_2$ ) and the difference in the pre- and post-pandemic trends in the outcomes (slope;  $\beta_3$ ).

**eTable 1. Total (Prevalent) Prescriptions Dispensed by Selected USC Drug Classes and Drugs, April 2018 – March 2022<sup>a</sup>**

| <b>USC Drug Class and Drug</b>         | <b>Prescriptions</b> | <b>%</b> | <b>USC Drug Class and Drug</b>                           | <b>Prescriptions</b> | <b>%</b> |
|----------------------------------------|----------------------|----------|----------------------------------------------------------|----------------------|----------|
| 64300 Antidepressants                  | 1,154,655,246        | 100%     | 64500 Analeptics                                         | 276,029,760          | 100%     |
| 64340 SSRI                             | 576,743,650          | 50%      | Amphetamine/Dextroamphetamine                            | 149,321,137          | 54%      |
| Sertraline                             | 180,369,088          | 31%      | Methylphenidate                                          | 58,588,537           | 21%      |
| Escitalopram                           | 150,410,750          | 26%      | Lisdexamfetamine                                         | 46,134,257           | 17%      |
| Fluoxetine                             | 114,863,177          | 20%      | Dexmethylphenidate                                       | 17,295,687           | 6%       |
| Citalopram                             | 85,671,171           | 15%      | Dextroamphetamine                                        | 3,008,406            | 1%       |
| Paroxetine                             | 41,100,267           | 7%       | Amphetamine                                              | 1,634,660            | 1%       |
| Fluvoxamine                            | 4,329,195            | 1%       | Methamphetamine                                          | 32,556               | <1%      |
| 64330 Newer Generation Antidepressants | 262,642,007          | 23%      | Dexmethylphenidate/Serdexmethylphenidate                 | 14,519               | <1%      |
| Bupropion                              | 138,635,544          | 53%      | 64610 Benzodiazepines                                    | 249,097,466          | 100%     |
| Trazodone                              | 123,727,523          | 47%      | Alprazolam                                               | 138,212,370          | 55%      |
| Nefazodone                             | 278,939              | <1%      | Lorazepam                                                | 72,019,106           | 29%      |
| 64350 SNRI                             | 190,171,185          | 16%      | Diazepam                                                 | 35,320,004           | 14%      |
| Duloxetine                             | 97,401,830           | 51%      | Chlordiazepoxide                                         | 1,706,774            | 1%       |
| Venlafaxine                            | 78,165,486           | 41%      | Clorazepate                                              | 1,324,673            | 1%       |
| Desvenlafaxine                         | 13,917,219           | 7%       | Oxazepam                                                 | 472,915              | <1%      |
| Levomilnacipran                        | 686,651              | <1%      | Midazolam                                                | 41,623               | <1%      |
| 64310 Tricyclics & Tetracyclics        | 110,826,157          | 10%      | 64700 Newer Generation Psychotherapy Agents <sup>b</sup> | 26,844,341           | 100%     |
| Amitriptyline                          | 46,368,017           | 42%      | Guanfacine ER                                            | 14,610,920           | 54%      |
| Mirtazapine                            | 36,076,677           | 33%      | Atomoxetine                                              | 10,728,838           | 40%      |
| Nortriptyline                          | 14,131,352           | 13%      | Clonidine ER                                             | 1,408,606            | 5%       |
| Doxepin                                | 9,708,387            | 9%       | Viloxazine ER                                            | 95,977               | <1%      |
| Imipramine                             | 2,471,382            | 2%       | 78340 Drug Dependence (MOUD)                             | 62,718,516           | 100%     |
| Clomipramine                           | 1,244,369            | 1%       | Buprenorphine/Naloxone                                   | 52,914,497           | 84%      |
| Desipramine                            | 676,666              | 1%       | Buprenorphine                                            | 9,804,019            | 16%      |
| Protriptyline                          | 109,430              | <1%      |                                                          |                      |          |
| Amoxapine                              | 18,327               | <1%      |                                                          |                      |          |
| Maprotiline                            | 12,049               | <1%      |                                                          |                      |          |
| Trimipramine                           | 9,500                | <1%      |                                                          |                      |          |
| 64360 SSRI/5-HT Partial Agonists       | 13,842,816           | 1%       |                                                          |                      |          |
| Vortioxetine                           | 8,503,920            | 61%      |                                                          |                      |          |
| Vilazodone                             | 5,338,896            | 39%      |                                                          |                      |          |
| 64320 MAO Inhibitors                   | 242,224              | <1%      |                                                          |                      |          |
| Phenelzine                             | 122,233              | 50%      |                                                          |                      |          |
| Tranylcypromine                        | 117,872              | 49%      |                                                          |                      |          |

|                                     |         |     |
|-------------------------------------|---------|-----|
| Isocarboxazid                       | 2,119   | 1%  |
| 64380 Antidepressant In Combination | 187,207 | <1% |
| Amitriptyline/Chlordiazepoxide      | 99,278  | 53% |
| Amitriptyline/Perphenazine          | 87,928  | 47% |

Abbreviation: USC, Uniform System of Classification, developed by IQVIA™; SSRI, Selective serotonin reuptake inhibitor; SNRI, Serotonin–norepinephrine reuptake inhibitor; MOUD, medications for opioid use disorder; 5-HT, 5-hydroxytryptamine (serotonin); MAO, monoamine oxidase

<sup>a</sup> Source: IQVIA National Prescription Audit™. April 2018 – March 2022. Extracted April 2023. Limited to oral formulations; other formulations (e.g., injection, implants) were not included. Data are provided for nationally estimated drug products labeled for mental health conditions, (e.g., guanfacine ER products labeled for ADHD, buprenorphine products labeled for MOUD treatment). Excludes prescriptions written by Veterinary Medicine. Only selected drugs from these USC Drug Class were included: only C-II stimulants were included from USC 64500; only buprenorphine-naloxone and buprenorphine MOUD products were included from USC 78340. Buprenorphine-containing products and methadone are approved for MOUD; however, methadone was not included as methadone for OUD is only available from opioid treatment programs. Methadone and buprenorphine products labeled for analgesia were excluded from our study. Only benzodiazepines from USC drug class 64610 were included because they are commonly used for anxiety in the outpatient setting unlike benzodiazepines in other USC drug classes.

<sup>b</sup> Newer Generation Psychotherapeutic Agents are referred to as “non-stimulant ADHD drugs” in our study.

**eTable 2. Interrupted Time-Series Regression Sensitivity Analyses of Monthly Incident<sup>a</sup> Prescriptions Dispensed (in Thousands) for Selected Drug Classes and Drugs, before and during the COVID-19 Pandemic<sup>b</sup>**

| Drug Class / Drug             | Pre-COVID-19 Pandemic (04/2018 – 02/2020) |                                     | Level Change Associated With COVID-19 Pandemic (05/2020) |  | During COVID-19 Pandemic (05/2020 – 03/2022) |  | Slope Change Associated With COVID-19 Pandemic |  |
|-------------------------------|-------------------------------------------|-------------------------------------|----------------------------------------------------------|--|----------------------------------------------|--|------------------------------------------------|--|
|                               | Intercept (95% CI)                        | Slope <sup>d</sup> (95% CI) P Value | Level Change (95% CI) P Value                            |  | Slope <sup>d</sup> (95% CI) P Value          |  | Slope Change (95% CI) P Value                  |  |
| Antidepressants               | 1144.030<br>(1083.799 – 1204.261)         | 6.589<br>(1.107 – 12.070) 0.020*    | -49.055<br>(-173.451 – 75.340) 0.431                     |  | 7.874<br>(2.121 – 13.627) 0.008*             |  | 1.285<br>(-6.661 – 9.231) 0.746                |  |
| Sertraline                    | 202.353<br>(191.697 – 213.008)            | 1.667<br>(0.717 – 2.618) 0.001*     | -8.868<br>(-31.779 – 14.043) 0.439                       |  | 1.519<br>(0.345 – 2.693) 0.012*              |  | -0.149<br>(-1.659 – 1.362) 0.843               |  |
| Escitalopram                  | 172.778<br>(163.835 – 181.720)            | 1.728<br>(0.906 – 2.552) <0.001*    | -1.284<br>(-22.296 – 19.729) 0.902                       |  | 1.706<br>(0.541 – 2.871) 0.005*              |  | -0.022<br>(-1.449 – 1.404) 0.975               |  |
| Benzodiazepines               | 59.458<br>(639.649 – 679.266)             | -2.783<br>(-4.306 – -1.261) 0.001*  | -7.906<br>(-44.341 – 28.530) 0.664                       |  | -0.542<br>(-2.632 – 1.549) 0.604             |  | 2.242<br>(-0.344 – 4.828) 0.088                |  |
| Alprazolam                    | 250.241<br>(242.120 – 258.361)            | -1.174<br>(-1.832 – -0.517) 0.001*  | -4.713<br>(-18.221 – 8.796) 0.485                        |  | -0.235<br>(-0.882 – 0.413) 0.468             |  | 0.939<br>(0.017 – 1.862) 0.046*                |  |
| Lorazepam                     | 201.630<br>(195.862 – 207.399)            | -0.560<br>(-1.023 – -0.098) 0.019*  | 0.355<br>(-9.865 – 10.576) 0.944                         |  | -0.029<br>(-0.584 – 0.527) 0.917             |  | -0.531<br>(-0.192 – 1.254) 0.917               |  |
| C-II Stimulant                | 198.675<br>(171.887 – 225.464)            | 1.739<br>(-0.358 – 3.835) 0.102     | -54.402<br>(-94.729 – -14.074) 0.009*                    |  | 5.623<br>(4.067 – 7.179) <0.001*             |  | 3.884<br>(1.273 – 6.495) 0.005*                |  |
| Amphetamine-Dextroamphetamine | 99.489<br>(90.013 – 108.965)              | 0.683<br>(0.087 – 1.453) 0.081      | -17.852<br>(-32.968 – -2.735) 0.022*                     |  | 2.925<br>(2.348 – 3.502) <0.001*             |  | 2.242<br>(1.280 – 3.205) <0.001*               |  |
| Methylphenidate               | 49.893<br>(39.787 – 59.999)               | 0.620<br>(-0.142 – 1.383) 0.108     | -19.408<br>(-33.792 – -5.024) 0.009*                     |  | 1.534<br>(0.952 – 2.116) <0.001*             |  | 0.914<br>(-0.045 – 1.874) 0.061                |  |
| Non-stimulant ADHD Drugs      | 35.735<br>(32.269 – 39.202)               | 0.634<br>(0.358 – 0.910) <0.001*    | -13.211<br>(-19.030 – -7.393) <0.001*                    |  | 1.725<br>(1.379 – 2.071) <0.001*             |  | 1.090<br>(0.648 – 1.533) <0.001*               |  |
| Atomoxetine                   | 20.381<br>(18.841 – 21.920)               | 0.344<br>(0.217 – 0.472) <0.001*    | -5.527<br>(-8.519 – -2.536) 0.001*                       |  | 1.105<br>(0.915 – 1.296) <0.001*             |  | 0.761<br>(0.532 – 0.990) <0.001*               |  |

|                                    |                                |                             |        |                               |         |                              |         |                               |       |
|------------------------------------|--------------------------------|-----------------------------|--------|-------------------------------|---------|------------------------------|---------|-------------------------------|-------|
|                                    | 14.383                         | 0.274                       |        | -6.794                        |         | 0.437                        |         | 0.162                         |       |
| Guanfacine ER                      | (12.158 –<br>16.607)           | (0.102 –<br>0.446)          | 0.002* | (-10.113 –<br>-3.474)         | <0.001* | (0.277 –<br>0.596)           | <0.001* | (-0.072 –<br>0.396)           | 0.170 |
| Buprenorphine<br>MOUD <sup>c</sup> | 36.986<br>(35.421 –<br>38.551) | 0.143<br>(0.002 –<br>0.284) | 0.047* | -2.791<br>(-5.735 –<br>0.154) | 0.063   | 0.015<br>(-0.116 –<br>0.145) | 0.823   | -0.129<br>(-0.321 –<br>0.064) | 0.184 |

Abbreviation: 95% CI, 95% Confidence interval; ADHD, attention deficit hyperactivity disorder; ER, extended-release; MOUD, medications for opioid use disorder

<sup>a</sup> Incident prescription is measured by new therapy start prescriptions, defined as prescriptions for a drug dispensed to patients with no prior prescription dispensed for a drug within the same drug class (e.g., USC 64300 Antidepressants) in the previous 12 months.

<sup>b</sup> Data Source: IQVIA National Prescription Audit™. April 2018 – March 2022 (Data from March 2020 and April 2020 were excluded for sensitivity analyses). Extracted March 2023. Limited to oral formulations; other formulations (e.g., injection, implants) were not included. Nationally estimated data are provided for drug products labeled for mental health conditions, (e.g., guanfacine ER products labeled for ADHD, buprenorphine-containing products labeled for opioid use disorder treatment). Prescriptions written by veterinary medicine, and prescriptions dispensed for unspecified patient age or gender were excluded. Except where specified, drugs include long-acting and short-acting formulations.

<sup>c</sup> Buprenorphine-containing products and methadone are approved for MOUD, methadone was not included as methadone for opioid use disorder is only available from OTP opioid treatment programs, only methadone for analgesia is through pharmacies. Only buprenorphine MOUD products (buprenorphine and buprenorphine/naloxone) labeled for the treatment of opioid use disorder were included in this drug class for our analyses.

<sup>d</sup> Slope coefficient is the estimated number of increases in NTS prescription in thousands per month; We used Prais–Winsten regression with the Cochrane–Orcutt transformation and robust SEs to adjust for first-order serial autocorrelation.

The COVID-19 outbreak in the United States constitutes a national emergency, beginning March 1, 2020.

\*Indicates the results are significant at 95% level.
