# Supplementary material
Source: PubMed Central journal article supplement (PMC10782382)
Supplement: jamapsychiatry-e235045-s002.pdf [file jamapsychiatry-e235045-s002.pdf]

# Data Sharing Statement

Chai. Trends in Incident Prescriptions for Behavioral Health Medications in the US, 2018-2022.  
*JAMA Psychiatry*. Published online April 1, 2024. doi:10.1001/jamapsychiatry.2023.5045

**Data**

**Data available:** No

**Data types:** Other (please specify)
